# Supplementary material for: Are there gender disparities in symptom presentation or triage of patients with chest discomfort at primary care out-of-hours services? An observational study
Source: PubMed Central journal article supplement — BMJ Open. 2019 Nov 19;9(11):e031613. doi: 10.1136/bmjopen-2019-031613 (PMC6886986; doi:10.1136/bmjopen-2019-031613), 2019-11-19
Supplement: bmjopen-2019-031613supp001.pdf [file bmjopen-2019-031613supp001.pdf]

**APPENDIX****Appendix-Table 1: Urgency levels**

| <b>Urgency level</b> | <b>Implication</b>                                              |
|----------------------|-----------------------------------------------------------------|
| U0                   | Reanimation                                                     |
| U1                   | Life-threatening, GP/ ambulance should arrive within 15 minutes |
| U2                   | Emergency, GP should arrive within 60 minutes                   |
| U3                   | Urgent, consultation by GP within three hours                   |
| U4                   | Routine, consultation by GP the same day                        |
| U5                   | Advise given by triage nurse                                    |

*U: urgency; GP: general practitioner*

**Appendix-Table 2: Items that were registered on a case record form**

|                                                      |                                                                  |
|------------------------------------------------------|------------------------------------------------------------------|
| Duration of the telephone call                       | Dyspnoea or chest tightness                                      |
| Was the conversation with the patient or a relative? | Fever, cough or having a cold                                    |
| Presence of chest pain                               | Smoking status                                                   |
| Type of pain                                         | History of diabetes mellitus                                     |
| Location of the chest pain                           | History of hypertension                                          |
| Intensity of the pain (score between 0 and 10)       | History of hypercholesterolemia                                  |
| Radiation of the pain                                | History of cardiovascular disease                                |
| Symptoms during rest or during exercise              | Complaints similar to previous episodes of cardiac disease       |
| Duration of the symptoms                             | Family history of cardiovascular disease                         |
| Similar symptoms in the last 4 weeks                 | Family history of sudden cardiac death below the age of 60 years |
| Nausea or vomiting                                   | Life-threatening disease suspected                               |
| Sweating                                             |                                                                  |

**Appendix-Table 3: Participants compared to patients with chest discomfort without a final diagnosis retrieved from the general practitioners**

|                                       | <b>Participants<br/>(n=518)</b> | <b>Non-participants<br/>(n=314)</b> | <b>P-value</b> |
|---------------------------------------|---------------------------------|-------------------------------------|----------------|
| <b>Duration of call, minutes</b>      | 7:15                            | 7:19                                | 0.750          |
| <b>Female sex</b>                     | 276 (53.3%)                     | 161 (51.3%)                         | 0.574          |
| <b>Mean age in years (SD)</b>         | 61.7 (17.1)                     | 61.4 (17.6)                         | 0.769          |
| <b>History of CVD</b>                 | 210 (52.6%)                     | 126 (54.5%)                         | 0.643          |
| <b>Chest pain</b>                     | 455 (89.9%)                     | 281 (90.9%)                         | 0.634          |
| <b>Radiation of chest pain</b>        | 295 (74.7%)                     | 171 (70.7%)                         | 0.266          |
| <b>Dyspnoea</b>                       | 219 (61.9%)                     | 138 (60.5%)                         | 0.746          |
| <b>Nausea/vomiting</b>                | 141 (38.3%)                     | 83 (40.3%)                          | 0.624          |
| <b>Sweating</b>                       | 166 (41.1%)                     | 86 (35.0%)                          | 0.120          |
| <b>High urgency allocation (U1-2)</b> | 338 (65.3%)                     | 206 (65.6%)                         | 0.917          |

*CVD = cardiovascular disease; (n=): number of patients; U = urgency*
